# Supplementary material for: Glucocorticoid tapering and associated outcome in patients with newly diagnosed systemic lupus erythematosus: the real-world GULP prospective observational study
Source: HighWire-hosted journal article supplement (doi:10.1136/rmdopen-2022-002701), 2022-12-01
Supplement: rmdopen-2022-002701supp001_data_supplement.pdf [file rmdopen-2022-002701supp001_data_supplement.pdf]

## SUPPLEMENTARY FILES.

*The GULP study***GLUCOCORTICOID TAPERING AND ASSOCIATED OUTCOME IN PATIENTS WITH NEWLY DIAGNOSED SYSTEMIC LUPUS ERYTHEMATOSUS: THE REAL-WORLD GULP OBSERVATIONAL PROSPECTIVE STUDY.**

**Supplementary Table 1.** SLICC/Damage Index items are categorized as certainly or probably glucocorticoid (GC) related and GC-unrelated according to previous definitions. The certainly or probably categories are considered glucocorticoid together as GC-related.

| DAMAGE DOMAIN              | ITEMS CERTAINLY GC-RELATED                                             | ITEMS PROBABLY GC-RELATED                                                                | ITEMS GC-UNRELATED                                                                                                                                                                                |
|----------------------------|------------------------------------------------------------------------|------------------------------------------------------------------------------------------|---------------------------------------------------------------------------------------------------------------------------------------------------------------------------------------------------|
| <b>OCULAR</b>              | Cataract                                                               | -                                                                                        | Retinal change                                                                                                                                                                                    |
| <b>NEUROPSYCHIATRIC</b>    | -                                                                      | Cognitive impairment<br>Psychosis<br>Cerebrovascular accident                            | Seizures<br>Transverse myelitis<br>Cranial or peripheral neuropathy                                                                                                                               |
| <b>RENAL</b>               | -                                                                      | -                                                                                        | Glomerular filtration rate < 50%<br>Proteinuria ≥ 3.5 gm/24 hours<br>End-stage renal disease                                                                                                      |
| <b>PULMONARY</b>           | -                                                                      | -                                                                                        | Pulmonary hypertension<br>Pulmonary fibrosis<br>Shrinking lung<br>Pleural fibrosis<br>Pulmonary infarction                                                                                        |
| <b>CARDIOVASCULAR</b>      | -                                                                      | Angina or coronary artery bypass<br>Myocardial infarction                                | Cardiomyopathy<br>Valvular disease<br>Pericarditis for six months, or pericardiectomy                                                                                                             |
| <b>PERIPHERAL VASCULAR</b> | -                                                                      | Claudication for six months<br>Minor tissue loss (pulp space)<br>Significant tissue loss | Venous thrombosis                                                                                                                                                                                 |
| <b>GASTROINTESTINAL</b>    | -                                                                      | -                                                                                        | Infarction or resection of bowel below duodenum spleen, liver, or gall bladder ever,<br>Mesenteric insufficiency<br>Chronic peritonitis<br>Stricture or upper gastrointestinal tract surgery ever |
| <b>MUSCULOSKELETAL</b>     | Avascular necrosis<br>Osteoporosis with fracture or vertebral collapse | Osteomyelitis<br>Muscle atrophy or weakness                                              | Deforming or erosive arthritis                                                                                                                                                                    |
| <b>SKIN</b>                | -                                                                      | -                                                                                        | Scarring chronic alopecia.<br>Extensive scarring or panniculus. Skin ulceration                                                                                                                   |
| <b>MISCELLANEA</b>         | -                                                                      | Diabetes                                                                                 | Malignancy<br>Menopause                                                                                                                                                                           |

## SUPPLEMENTARY FILES.

*The GULP study***Supplementary Figure 1.** Study flow diagram.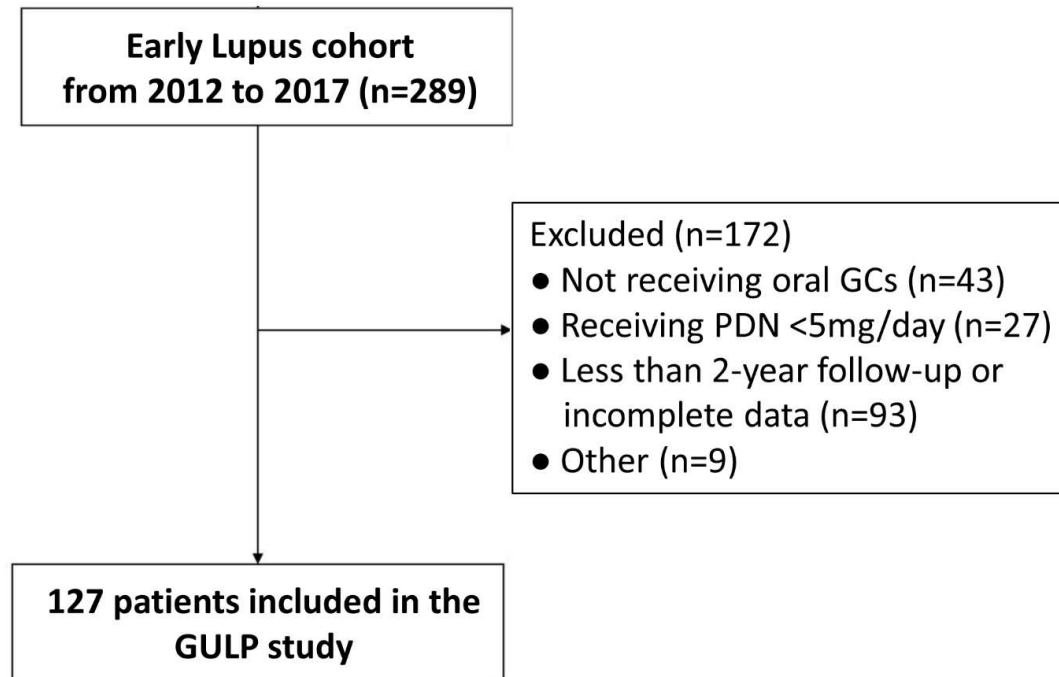

## SUPPLEMENTARY FILES.

## The GULP study

**Supplementary Table 2.** Attrition analysis with descriptive data for available baseline variables on included vs. excluded persons showed no major differences between groups. Patients with a baseline dose of prednisone above 5mg but with insufficient information on visits (lost to follow-up within two years or incomplete data) were used for the comparison.

| Features                                              | Patients included<br>(n=127) | Patients excluded<br>(n=93) | P-value      |
|-------------------------------------------------------|------------------------------|-----------------------------|--------------|
| Age, mean ( $\pm$ SD)                                 | 36.7 (13.4)                  | 37.3 (15.6)                 | 0.958        |
| Female                                                | 105 (82.7%)                  | 84 (91.3%)                  | 0.102        |
| < 1 year elapsed since the onset of SLE symptoms      | 30 (24%)                     | 32 (34.8%)                  | 0.113        |
| <b>Clinical phenotypes according to BILAG domains</b> |                              |                             |              |
| Constitutional                                        | 58 (45.7%)                   | 32 (35.2%)                  | 0.157        |
| Mucocutaneous                                         | 67 (53.2%)                   | 48 (52.2%)                  | 0.993        |
| Neuropsychiatric                                      | 11 (8.7%)                    | 5 (5.4%)                    | 0.52         |
| Musculoskeletal                                       | 78 (61.4%)                   | 59 (64.1%)                  | 0.789        |
| Cardiorespiratory                                     | 26 (20.5%)                   | 22 (23.9%)                  | 0.658        |
| Gastrointestinal                                      | 7 (5.5%)                     | 3 (3.3%)                    | 0.525        |
| Ophthalmic                                            | 0 (0%)                       | 3 (3.3%)                    | 0.073        |
| Renal                                                 | 46 (36.2%)                   | 33 (35.9%)                  | 1            |
| Hematological                                         | 55 (43.3%)                   | 37 (40.2%)                  | 0.75         |
| <b>Serologic features</b>                             |                              |                             |              |
| Anti-dsDNA                                            | 101 (80.8%)                  | 69 (80.2%)                  | 1            |
| Anti-Ro/SSA                                           | 41 (35.3%)                   | 44 (51.8%)                  | <b>0.029</b> |
| Anti-La/SSB                                           | 20 (17.4%)                   | 13 (16%)                    | 0.957        |
| Anti-RNP                                              | 31 (26.7%)                   | 19 (23.8%)                  | 0.762        |
| Anti-Sm                                               | 30 (26.1%)                   | 18 (22.8%)                  | 0.723        |
| Antiphospholipid Antibodies*                          | 27 (26.2%)                   | 17 (23.6%)                  | 0.831        |
| C3 complement fraction(mg/dl), median (IQR)           | 69 (50 - 91)                 | 73 (51 - 97)                | 0.447        |
| C4 complement fraction (mg/dl), median (IQR)          | 11 (6 - 15)                  | 9 (7 - 17)                  | 0.903        |
| <b>ECLAM (<math>\geq</math>3)</b>                     | 66 (52.8%)                   | 45 (49.5%)                  | 0.727        |
| <b>SDI, mean (<math>\pm</math>SD)</b>                 | 0.2 (0.6)                    | 0.3 (0.8)                   | 0.766        |
| <b>Comorbidities</b>                                  |                              |                             |              |
| Hypertension                                          | 17 (13.4%)                   | 23 (25%)                    | <b>0.044</b> |
| Dyslipidemia                                          | 17 (13.4%)                   | 14 (15.4%)                  | 0.826        |
| Diabetes                                              | 4 (3.1%)                     | 2 (2.2%)                    | 1            |
| Smoking (ever)                                        | 30 (68.2%)                   | 23 (65.7%)                  | 1            |
| <b>Prednisone (prior to enrolment)</b>                | 21 (16.5%)                   | 17 (20%)                    | 0.644        |

## SUPPLEMENTARY FILES.

*The GULP study*

**Supplementary Table 3.** Details of medications prescribed at baseline and ongoing after 24 months of follow-up.

| <b>Medication</b>             | <b>Baseline</b> | <b>End of follow-up</b> |
|-------------------------------|-----------------|-------------------------|
| <b>Prednisone</b>             | 127 (100)       | 110 (86.6)              |
| <b>Hydroxychloroquine</b>     | 98 (77.2)       | 101 (79.5)              |
| <b>Mycophenolate</b>          | 32 (25.2)       | 37 (29.1)               |
| <b>Methotrexate</b>           | 21 (16.5)       | 25 (19.7)               |
| <b>Azathioprine</b>           | 17 (13.4)       | 19 (15.0)               |
| <b>Calcineurin inhibitors</b> | 3 (2.4)         | 9 (7.1)                 |
| <b>Cyclophosphamide</b>       | 11 (8.7)        | 3 (2.4)                 |
| <b>Thalidomide</b>            | 0 (22.6)        | 1 (0.8)                 |
| <b>Belimumab</b>              | 5 (3.9)         | 10 (7.9)                |
| <b>Rituximab</b>              | 4 (3.1)         | 3 (2.4)                 |
| <b>Abatacept</b>              | 0 (0)           | 1 (0.8)                 |

Numbers are absolute values (numbers in brackets are percentages).

## SUPPLEMENTARY FILES.

The GULP study

**Supplementary Table 4.** The percentage of prednisone dose tapering in the whole cohort of newly diagnosed SLE patients according to the different intervals of mean prednisone daily dose (one-way ANOVA  $p < 0.001$ ).

| Prednisone daily dose (mg) | number of visits<br>(n=256) | % PDN dose Tapering<br>(Mean $\pm$ SD) |
|----------------------------|-----------------------------|----------------------------------------|
| >30                        | 28                          | 61.1% ( $\pm 20.9\%$ )                 |
| $\leq 30$ but >15          | 55                          | 53.3 ( $\pm 22.4\%$ )                  |
| $\leq 15$ but >7.5         | 93                          | 44.2* ( $\pm 20.8\%$ )                 |
| $\leq 7.5$ but $\geq 5$    | 59                          | 39.7*. <sup>o</sup> ( $\pm 17.3\%$ )   |
| <5                         | 21                          | 52.3 ( $\pm 18.0\%$ )                  |

\* $p < 0.01$  compared to daily prednisone dose >30 mg/day by one-way ANOVA with post-test comparing all column pairs between groups.

<sup>o</sup> $p < 0.01$  compared to daily prednisone dose <30 but  $\geq 15$  by one-way ANOVA with post-test comparing all column pairs between groups.

**Supplementary Table 5.** The rates (%) of changes in GCs doses over the follow-up time. Significance  $p$ -values calculated according to the Cochran-Armitage test with one degree of freedom are reported.

|               | 6-month | 12-month | 18-month | 24-month | P      |
|---------------|---------|----------|----------|----------|--------|
| Tapering      | 70.1    | 48.1     | 46.5     | 37.0     | <0.001 |
| Unchanging    | 13.4    | 29.9     | 33.9     | 36.2     | <0.001 |
| Increasing    | 14.1    | 18.1     | 12.6     | 13.4     | 0.574  |
| Discontinuing | 2.4     | 3.9      | 7.0      | 13.4     | <0.001 |

**Supplementary Table 6.** The rates of changes in GCs doses, grouped by prednisone daily dose, in the whole cohort of 127 newly diagnosed SLE patients.

| Whole Cohort                         | Tapering<br>(n=256) | Unchanging<br>(n=144) | Increasing<br>(n=72) | Discontinuing<br>(n=21) |
|--------------------------------------|---------------------|-----------------------|----------------------|-------------------------|
| >30 mg/d (n=30)                      | 29 (96.7)           | 0 (0)                 | 1 (3.3)              | 0 (0)                   |
| $\leq 30$ and >15 mg/d (n=63)        | 55 (87.3)           | 3 (4.8)               | 4 (6.4)              | 1 (1.6)                 |
| $\leq 15$ and >7.5 mg/d (n=124)      | 93 (75.0)           | 18 (14.5)             | 11 (8.9)             | 2 (1.6)                 |
| $\leq 7.5$ and $\geq 5$ mg/d (n=136) | 59 (43.4)           | 54 (39.7)             | 19 (14.0)            | 4 (2.9)                 |
| <5 and $\geq 2.5$ mg/d (n=101)       | 17 (17.2)           | 48 (48.5)             | 29 (28.7)            | 7 (8.1)                 |
| <2.5 and >0 mg/d (n=39)              | 3 (7.3)             | 21 (56.1)             | 8 (19.5)             | 7 (17.1)                |

Numbers are absolute values (numbers in brackets are percentages).
